# Supplementary material for: Catastrophic Household Expenditure Associated with Out-of-Pocket Healthcare Payments in Spain
Source: MDPI journal article supplement (doi:10.3390/ijerph18030932), 2021-01-21
Supplement: s1 [file s1]

**Table 1.** Data coding of the explanatory variables.

|                          |                                                                   | <b>Value code</b> |
|--------------------------|-------------------------------------------------------------------|-------------------|
|                          |                                                                   |                   |
| Gender                   | Male                                                              | 0                 |
|                          | Female                                                            | 1                 |
| Age                      | Age less than 65                                                  | 0                 |
|                          | 65-74                                                             | 1                 |
|                          | 75-84                                                             | 2                 |
|                          | More than 85                                                      | 3                 |
| Marital Status           | Married Status                                                    | 0                 |
|                          | Single                                                            | 1                 |
|                          | Separated / Divorced                                              | 2                 |
|                          | Widowed                                                           | 3                 |
| Educational level        | Low level (Primary school incomplete, primary or equivalent)      | 0                 |
|                          | Middle level (Secondary school / middle level professional)       | 1                 |
|                          | University degree or equivalent (University degree or equivalent) | 2                 |
| Activity Status          | Employed)                                                         | 0                 |
|                          | Unemployed                                                        | 1                 |
|                          | Receiving earnings-related pension                                | 2                 |
|                          | Other situations (homecare, student, ...)                         | 3                 |
| Household Monthly Income | Low Level Income (less than €1200))                               | 0                 |
|                          | Middle level income (€1200 - €2500)                               | 1                 |
|                          | High level income (more than €2500)                               | 2                 |
| GDP per capita           | Low GDP per capita                                                | 0                 |
|                          | Middle GDP per capita                                             | 1                 |
|                          | High GDP per capita                                               | 2                 |
| Place of residence       | Rural                                                             | 0                 |
|                          | Urban                                                             | 1                 |
